# Supplementary material
Source: Springer Nature journal article supplement (https://www.springermedizin.de/resource/supplementary/12885_2009_2054_MOESM1_ESM.pdf/9460404)

**A431**  
**(High ErbB1)**

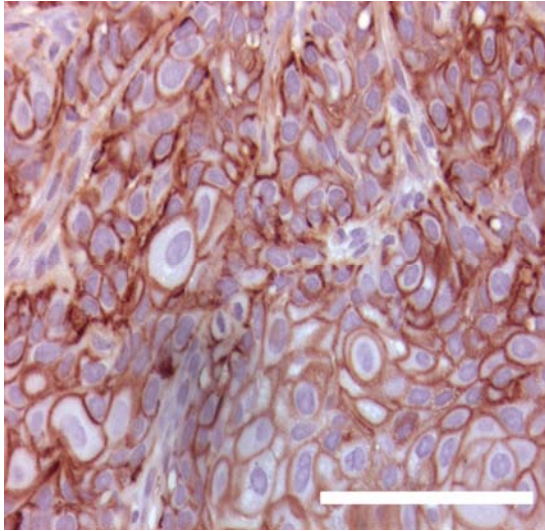

**MDA-MB-231**  
**(Interm ErbB1)**

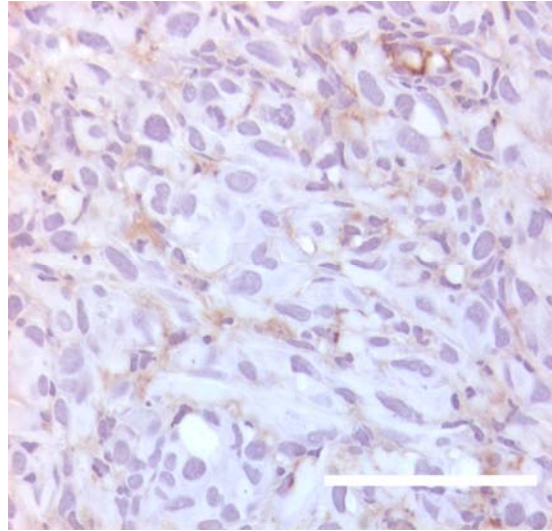

**231-H2N**  
**(High ErbB2)**

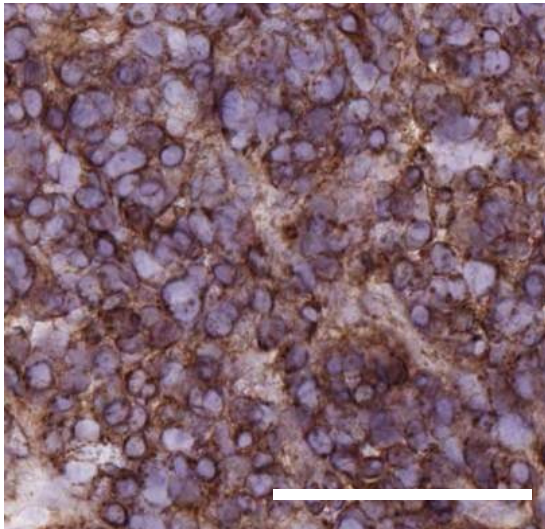

**MDA-MB-231**  
**(Low ErbB2)**

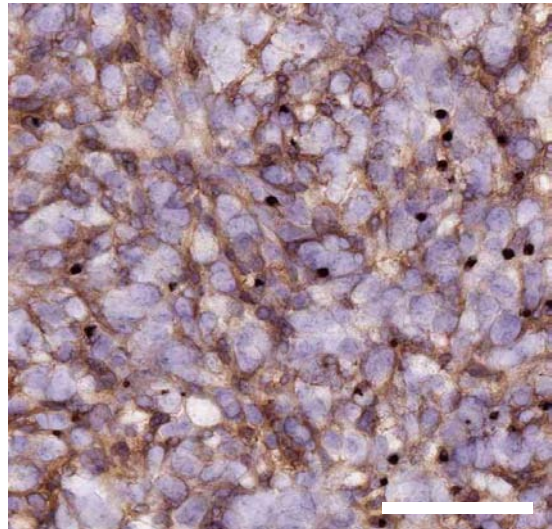

Supplement: MOESM1 [file 9460404]
